# Supplementary material
Source: PubMed Central journal article supplement (PMC7876877)
Supplement: advancesADV2020002469-Suppl1.pdf [file advancesADV2020002469-Suppl1.pdf]

## TABLE OF CONTENTS

|                                                                                                                                   |                   |
|-----------------------------------------------------------------------------------------------------------------------------------|-------------------|
| <b>Supplemental Table S1: Individual clinicopathologic data for all cases</b>                                                     | <b>Excel file</b> |
| <b>Supplemental Table S2. SCFL and PCFCL (systemic) mutations found in COSMIC hotspots and functionally validated</b>             | <b>2</b>          |
| <b>Supplemental Table S3. PCFCL (skin restricted) mutations found in COSMIC hotspots and functionally validated</b>               | <b>3</b>          |
| <b>Supplemental Table S4. SCFL and PCFCL (systemic) damaging mutations in B cell lymphoma tumor suppressors</b>                   | <b>4</b>          |
| <b>Supplemental Table S5. PCFCL (skin restricted) damaging mutations in B cell lymphoma tumor suppressors</b>                     | <b>5</b>          |
| <b>Supplemental Table S6. SCFL and PCFCL (systemic) damaging mutations in canonical tumor suppressors</b>                         | <b>6</b>          |
| <b>Supplemental Table S7. PCFCL (skin restricted) damaging mutations in canonical tumor suppressors</b>                           | <b>7</b>          |
| <b>Supplemental Table S8. Frequencies of copy number alterations in 5 PCFCL cases</b>                                             | <b>8</b>          |
| <b>Supplemental Table S9. Recurrently mutated genes in PCFCL and SCFL occurring in 3 or more cases</b>                            | <b>9</b>          |
| <b>Supplemental Figure S1. Progression-free survival for PCFCL, systemic spread (n=26) vs. PCFCL, skin restricted cases (n=4)</b> | <b>10</b>         |
| <b>Supplemental Figure S2. Copy number analysis of 5 PCFCL samples using the OncoScan assay</b>                                   | <b>11</b>         |
| <b>Supplemental Figure S3. Correlation matrix of similarity comparing PCFCL (skin restricted) and SCFL with other FL subtypes</b> | <b>12</b>         |
| <b>Supplemental Figure S4. Similarity index comparing PCFCL (skin restricted) with other FL subtypes</b>                          | <b>13</b>         |

Supplemental Table S2. SCFCL and PCFCL (systemic) mutations found in COSMIC hotspots and functionally validated

**COSMIC hotspot  $\geq$  20 mutations**

| Gene          | Amino acid change | # Mutations in COSMIC in hotspot area (+/- 5 amino acids) | # Mutations in COSMIC at amino acid position | Functional validation | Targetable | # SCFCL samples with mutation | % SCFCL samples with mutation | # PCFCL (systemic) samples with mutation | % PCFCL (systemic) samples with mutation | # SCFCL and PCFCL (systemic) samples with mutation | % SCFCL and PCFCL (systemic) samples with mutation |
|---------------|-------------------|-----------------------------------------------------------|----------------------------------------------|-----------------------|------------|-------------------------------|-------------------------------|------------------------------------------|------------------------------------------|----------------------------------------------------|----------------------------------------------------|
| <i>KRAS</i>   | p.G13D            | 42944                                                     | 6056                                         | Y                     | Y          | 0                             | 0%                            | 1                                        | 50%                                      | 1                                                  | 13%                                                |
| <i>EZH2</i>   | p.Y646S           | 405                                                       | 392                                          | Y                     | Y          | 1                             | 17%                           | 0                                        | 0%                                       | 1                                                  | 13%                                                |
| <i>EZH2</i>   | p.Y646N           | 405                                                       | 392                                          | Y                     | Y          | 1                             | 17%                           | 0                                        | 0%                                       | 1                                                  | 13%                                                |
| <i>CREBBP</i> | p.R1446C          | 75                                                        | 63                                           | Y                     |            | 1                             | 17%                           | 1                                        | 50%                                      | 2                                                  | 25%                                                |
| <i>CREBBP</i> | p.Y1482H          | 40                                                        | 12                                           | Y                     |            | 1                             | 17%                           | 0                                        | 0%                                       | 1                                                  | 13%                                                |
| <i>CREBBP</i> | p.Y1503C          | 36                                                        | 26                                           | Y                     |            | 1                             | 17%                           | 0                                        | 0%                                       | 1                                                  | 13%                                                |
| <i>STAT6</i>  | p.D419N           | 33                                                        | 23                                           | Y                     | Y          | 1                             | 17%                           | 0                                        | 0%                                       | 1                                                  | 13%                                                |
| <i>EZH2</i>   | p.D185H           | 28                                                        | 23                                           | Y†                    | Y          | 0                             | 0%                            | 1                                        | 50%                                      | 1                                                  | 13%                                                |

**COSMIC hotspot < 20 mutations**

| Gene          | Amino acid change | # Mutations in COSMIC in hotspot area (+/- 5 amino acids) | # Mutations in COSMIC at amino acid position | Functional validation | Targetable | # SCFCL samples with mutation | % SCFCL samples with mutation | # PCFCL (systemic) samples with mutation | % PCFCL (systemic) samples with mutation | # SCFCL and PCFCL (systemic) samples with mutation | % SCFCL and PCFCL (systemic) samples with mutation |
|---------------|-------------------|-----------------------------------------------------------|----------------------------------------------|-----------------------|------------|-------------------------------|-------------------------------|------------------------------------------|------------------------------------------|----------------------------------------------------|----------------------------------------------------|
| <i>IL4R</i>   | p.I242N           | 11                                                        | 6                                            | Y                     | Y          | 1                             | 17%                           | 0                                        | 0%                                       | 1                                                  | 13%                                                |
| <i>CREBBP</i> | p.L1621P          | 13                                                        | 1                                            | Y†                    |            | 1                             | 17%                           | 0                                        | 0%                                       | 1                                                  | 13%                                                |

Mutations found in COSMIC hotspot reflects those in a COSMIC region within 5 amino acids of the original mutation position. Y= yes. † = Hotspot but not exact amino acid change has been previously functionally validated as tumorigenic.

Supplemental Table S3. PCFCL (skin restricted) mutations found in COSMIC hotspot

| <b>COSMIC hotspot &gt; 20 mutations</b> |                          |                                                                  |                                                     |                              |                   |                                                        |                                                        |
|-----------------------------------------|--------------------------|------------------------------------------------------------------|-----------------------------------------------------|------------------------------|-------------------|--------------------------------------------------------|--------------------------------------------------------|
| <b>Gene</b>                             | <b>Amino acid change</b> | <b># Mutations in COSMIC in hotspot area (+/- 5 amino acids)</b> | <b># Mutations in COSMIC at amino acid position</b> | <b>Functional validation</b> | <b>Targetable</b> | <b># PCFCL (skin restricted) samples with mutation</b> | <b>% PCFCL (skin restricted) samples with mutation</b> |
| <i>EZH2</i>                             | p.Y646F                  | 405                                                              | 392                                                 | Y                            | Y                 | 1                                                      | 6%                                                     |
| <i>JAK3</i>                             | p.V722I                  | 42                                                               | 31                                                  | Y                            | Y                 | 1                                                      | 6%                                                     |
| <i>MYC</i>                              | p.P60A                   | 80                                                               | 8                                                   | Y                            |                   | 1                                                      | 6%                                                     |
| <i>CARD11</i>                           | p.G123D                  | 40                                                               | 4                                                   | Y                            | Y                 | 1                                                      | 6%                                                     |
| <i>MYC</i>                              | p.P63S                   | 30                                                               | 3                                                   | Y*                           |                   | 1                                                      | 6%                                                     |
| <i>FOXO1</i>                            | p.T24A                   | 29                                                               | 4                                                   | Y                            |                   | 1                                                      | 6%                                                     |
| <i>MYC</i>                              | p.N260L                  | 20                                                               | 2                                                   | Y                            |                   | 1                                                      | 6%                                                     |

  

| <b>COSMIC hotspot ≤ 20 mutations</b> |                          |                                                                  |                                                     |                              |                   |                                                        |                                                        |
|--------------------------------------|--------------------------|------------------------------------------------------------------|-----------------------------------------------------|------------------------------|-------------------|--------------------------------------------------------|--------------------------------------------------------|
| <b>Gene</b>                          | <b>Amino acid change</b> | <b># Mutations in COSMIC in hotspot area (+/- 5 amino acids)</b> | <b># Mutations in COSMIC at amino acid position</b> | <b>Functional validation</b> | <b>Targetable</b> | <b># PCFCL (skin restricted) samples with mutation</b> | <b>% PCFCL (skin restricted) samples with mutation</b> |
| <i>RHOA</i>                          | p.F39C                   | 10                                                               | 1                                                   | Y                            |                   | 1                                                      | 6%                                                     |

Mutations found in COSMIC hotspot reflects those in a COSMIC region within 5 amino acids of the original mutation position. Y= yes. \* = Hotspot but not exact amino acid change has been previously functionally validated as tumorigenic.

**Supplemental Table S4. SCFCL and PCFCL (systemic) damaging mutations in BCL tumor suppressors**

| <b>Gene</b>     | <b># SCFCL samples with damaging mutation</b> | <b>% SCFCL samples with damaging mutation</b> | <b># PCFCL (systemic) samples with damaging mutation</b> | <b>% PCFCL (systemic) samples with damaging mutation</b> | <b># SCFCL and PCFCL (systemic) samples with damaging mutation</b> | <b>% SCFCL and PCFCL (systemic) samples with damaging mutation</b> |
|-----------------|-----------------------------------------------|-----------------------------------------------|----------------------------------------------------------|----------------------------------------------------------|--------------------------------------------------------------------|--------------------------------------------------------------------|
| <i>CREBBP</i>   | 4                                             | 67%                                           | 1                                                        | 50%                                                      | 5                                                                  | 63%                                                                |
| <i>KMT2D</i>    | 3                                             | 50%                                           | 1                                                        | 50%                                                      | 4                                                                  | 50%                                                                |
| <i>TNFRSF14</i> | 1                                             | 17%                                           | 1                                                        | 50%                                                      | 2                                                                  | 25%                                                                |
| <i>FAS</i>      | 0                                             | 0%                                            | 1                                                        | 50%                                                      | 1                                                                  | 13%                                                                |
| <i>IKZF1</i>    | 0                                             | 0%                                            | 1                                                        | 50%                                                      | 1                                                                  | 13%                                                                |

SCFCL and PCFCL (systemic) tumor suppressors reflect putative driver genes wherein >20% of mutations from previous BCL studies are damaging.

**Supplemental Table S5. PCFCL (skin restricted) damaging mutations in BCL tumor suppressors**

| <b>Gene</b>     | <b># PCFCL (skin restricted) samples with damaging mutation</b> | <b>% PCFCL (skin restricted) samples with damaging mutation</b> |
|-----------------|-----------------------------------------------------------------|-----------------------------------------------------------------|
| <i>TNFRSF14</i> | 4                                                               | 25%                                                             |
| <i>MSH2</i>     | 2                                                               | 13%                                                             |
| <i>IRF8</i>     | 1                                                               | 6%                                                              |
| <i>HIST1H1E</i> | 1                                                               | 6%                                                              |
| <i>EP300</i>    | 1                                                               | 6%                                                              |
| <i>TET2</i>     | 1                                                               | 6%                                                              |
| <i>KMT2C</i>    | 1                                                               | 6%                                                              |
| <i>SETD2</i>    | 1                                                               | 6%                                                              |
| <i>SOCS1</i>    | 1                                                               | 6%                                                              |
| <i>B2M</i>      | 1                                                               | 6%                                                              |
| <i>CD58</i>     | 1                                                               | 6%                                                              |
| <i>FAS</i>      | 1                                                               | 6%                                                              |
| <i>BTG1</i>     | 1                                                               | 6%                                                              |
| <i>EBF1</i>     | 1                                                               | 6%                                                              |
| <i>FBXO11</i>   | 1                                                               | 6%                                                              |
| <i>GNA13</i>    | 1                                                               | 6%                                                              |
| <i>MLH1</i>     | 1                                                               | 6%                                                              |
| <i>PALB2</i>    | 1                                                               | 6%                                                              |
| <i>RB1</i>      | 1                                                               | 6%                                                              |

PCFCL (skin restricted) tumor suppressors reflect putative driver genes wherein >20% of mutations from previous BCL studies are damaging.

**Supplemental Table S6. SCFCL and PCFCL (systemic) damaging mutations in canonical tumor suppressors**

| <b>Gene</b>     | <b># SCFCL &amp; PCFCL (systemic) samples with damaging mutation</b> | <b>% SCFCL &amp; PCFCL (systemic) samples with damaging mutation</b> |
|-----------------|----------------------------------------------------------------------|----------------------------------------------------------------------|
| <i>KMT2D</i>    | 4                                                                    | 50%                                                                  |
| <i>TNFRSF14</i> | 2                                                                    | 25%                                                                  |
| <i>FAS</i>      | 1                                                                    | 13%                                                                  |
| <i>IKZF1</i>    | 1                                                                    | 13%                                                                  |

Canonical tumor suppressors reflect consensus cancer genes wherein >20% of mutations are damaging mutations in COSMIC.

**Supplemental Table S7. PCFCL (skin restricted) damaging mutations in canonical tumor suppressors**

| <b>Gene</b>     | <b># PCFCL (skin restricted) samples with damaging mutation</b> | <b>% PCFCL (skin restricted) samples with damaging mutation</b> |
|-----------------|-----------------------------------------------------------------|-----------------------------------------------------------------|
| <i>TNFRSF14</i> | 4                                                               | 25%                                                             |
| <i>MSH2</i>     | 2                                                               | 13%                                                             |
| <i>FAS</i>      | 1                                                               | 6%                                                              |
| <i>IRF8</i>     | 1                                                               | 6%                                                              |
| <i>KMT2C</i>    | 1                                                               | 6%                                                              |
| <i>HIST1H1E</i> | 1                                                               | 6%                                                              |
| <i>TET2</i>     | 1                                                               | 6%                                                              |
| <i>EP300</i>    | 1                                                               | 6%                                                              |
| <i>SOCS1</i>    | 1                                                               | 6%                                                              |
| <i>B2M</i>      | 1                                                               | 6%                                                              |
| <i>CD58</i>     | 1                                                               | 6%                                                              |
| <i>BTG1</i>     | 1                                                               | 6%                                                              |
| <i>EBF1</i>     | 1                                                               | 6%                                                              |
| <i>FBXO11</i>   | 1                                                               | 6%                                                              |
| <i>GNA13</i>    | 1                                                               | 6%                                                              |
| <i>MLH1</i>     | 1                                                               | 6%                                                              |
| <i>PALB2</i>    | 1                                                               | 6%                                                              |
| <i>PTCH1</i>    | 1                                                               | 6%                                                              |
| <i>RB1</i>      | 1                                                               | 6%                                                              |

Canonical tumor suppressors reflect consensus cancer genes wherein >20% of mutations are damaging mutations in COSMIC.

**Supplemental Table S8. Frequencies of copy number alterations in 5 PCFCL cases**

| Region                        | Cytoband Location | Region Length (kb) | Event   | Frequency (%) |
|-------------------------------|-------------------|--------------------|---------|---------------|
| chr1:143,862,902-146,627,564  | q21.1             | 2764662            | CN Gain | 40            |
| chr1:175,980,871-176,205,159  | q25.1 - q25.2     | 224288             | CN Gain | 40            |
| chr1:754,191-13,477,395       | p36.33 - p36.21   | 12723204           | CN Loss | 60            |
| chr2:60,722,241-62,448,399    | p16.1 - p15       | 1726158            | CN Gain | 40            |
| chr2:89,160,445-89,270,361    | p11.2             | 109916             | CN Loss | 40            |
| chr6:137,372,463-138,071,287  | q23.3             | 698824             | CN Loss | 40            |
| chr6:138,085,248-138,325,071  | q23.3             | 239823             | CN Loss | 40            |
| chr6:222,951-40,057,184       | p25.3 - p21.2     | 39834233           | LOH     | 80            |
| chr7:41,421-159,118,443       | p22.3 - q36.3     | 159077022          | CN Gain | 40            |
| chr9:204,738-39,184,065       | p24.3 - p13.1     | 38979327           | LOH     | 60            |
| chr9:21,795,661-22,019,732    | p21.3             | 224071             | CN Loss | 40            |
| chr10:63,025,417-67,436,888   | q21.2 - q21.3     | 4411471            | CN Loss | 40            |
| chr10:83,038,265-91,090,551   | q23.1 - q23.31    | 8052286            | CN Loss | 40            |
| chr14:106,157,764-106,353,338 | q32.33            | 195574             | CN Loss | 60            |
| chr18:18,554,307-60,785,638   | q11.1 - q21.33    | 42231331           | CN Gain | 40            |

Visual representation in Figure S2



**Supplemental Table S9. Recurrently mutated genes in PCFCL and SCFL occurring in 3 or more cases**  
*Includes non-functionally validated mutations*

|                 | <b>PCFCL Cases</b> | <b>SCFL Cases</b> | <b>Gene Function</b>                                                                                                                                                                                                                                                                                                                               |
|-----------------|--------------------|-------------------|----------------------------------------------------------------------------------------------------------------------------------------------------------------------------------------------------------------------------------------------------------------------------------------------------------------------------------------------------|
| <b>CREBBP</b>   | 3/18               | 5/6               | Lysine acetyltransferase that acetylates histones H3L18Ac and H3K27Ac. Functions as transcriptional coactivator by acetyating histones at regulatory histones. Mutated in ~65% of usual systemic FLs.                                                                                                                                              |
| <b>KMT2D</b>    | 4/18               | 3/6               | Lysine methyltransferase responsible for the majority of H3K4 monomethylation at enhancer elements that leads to recruitment of other co-activators. Mutated in ~72% of usual systemic FLs.                                                                                                                                                        |
| <b>HIST1H1E</b> | 4/18               | 0/6               | Linker histone that binds DNA at entry and exit sites of nucleosome and are required for stability of the higher-order chromatin structure. HISTH1E can be methylated at lysine 226 by EZH2 to create a docking site for HP1 and facilitate heterochromatin formation. Mutated in ~14% of usual systemic FLs.                                      |
| <b>MYC</b>      | 3/18               | 0/6               | Transcription factor that promotes transition from G0/G1 phase to S phase and drives cell proliferation and growth.                                                                                                                                                                                                                                |
| <b>TNFRSF14</b> | 6/18               | 2/6               | Encodes the herpes virus entry mediator (HVEM), which acts as a molecular switch through interactions with BTLA, LIGHT, CD160, lymphotoxin A and glycoprotein D. HVEM deficiency induces a tumor-supportive microenvironment by disrupting inhibitor cell-cell interactions between HVEM and BTLA. Mutated in 18-46% of usual systemic FL patients |
| <b>IRF8</b>     | 3/18               | 1/6               | Transcription factor with critical role in controlling early stage B cell development including follicular B cells and positively regulates BCL6. Mutated in 6% of usual systemic FL patients                                                                                                                                                      |

Green MR. Chromatin modifying gene mutations in follicular lymphoma. *Blood*. 2018;131(6):595-604.

Li H, Kaminski MS, Li Y, et al. Mutations in linker histone genes HIST1H1 B, C, D, and E; OCT2 (POU2F2); IRF8; and ARID1A underlying the pathogenesis of follicular lymphoma. *Blood*. 2014;123(10):1487-1498.

Boice M, Salloum D, Mourcin F, et al. Loss of the HVEM Tumor Suppressor in Lymphoma and Restoration by Modified CAR-T Cells. *Cell*. 2016;167(2):405-418.e13.

Aukema SM, van Pel R, Nagel I, et al. MYC expression and translocation analyses in low-grade and transformed follicular lymphoma. *Histopathology*. 2017;71(6):960-971.

**Supplemental Figure S1.** Progression-free survival for PCFCL, systemic spread (n=26) vs. PCFCL, skin restricted cases (n=4)

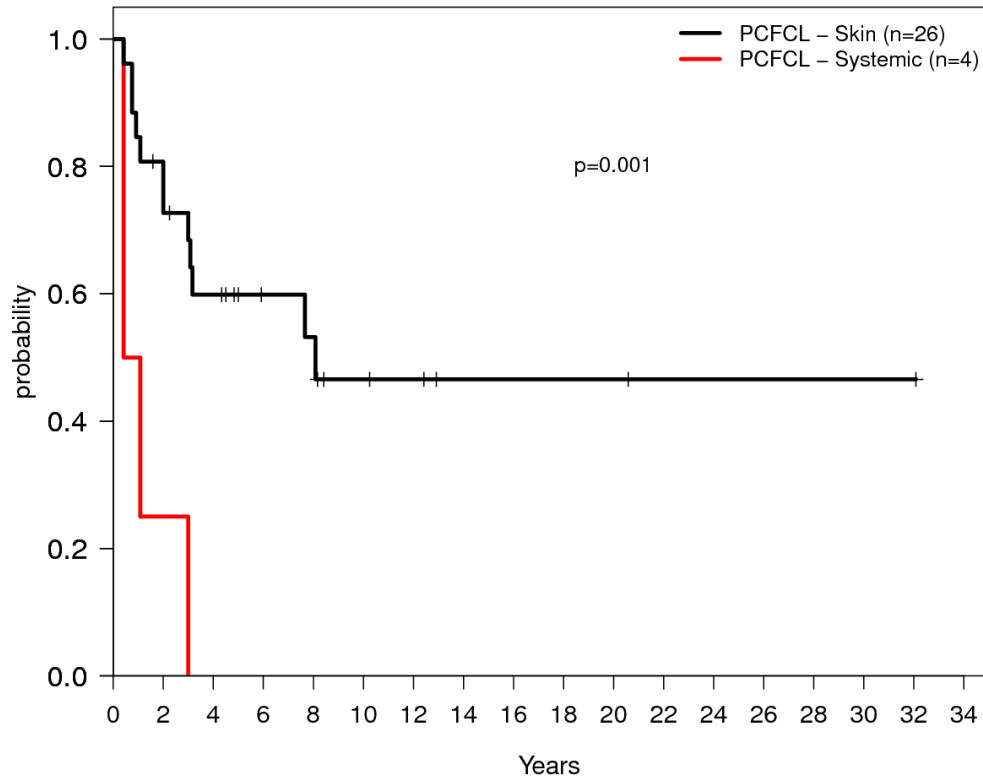

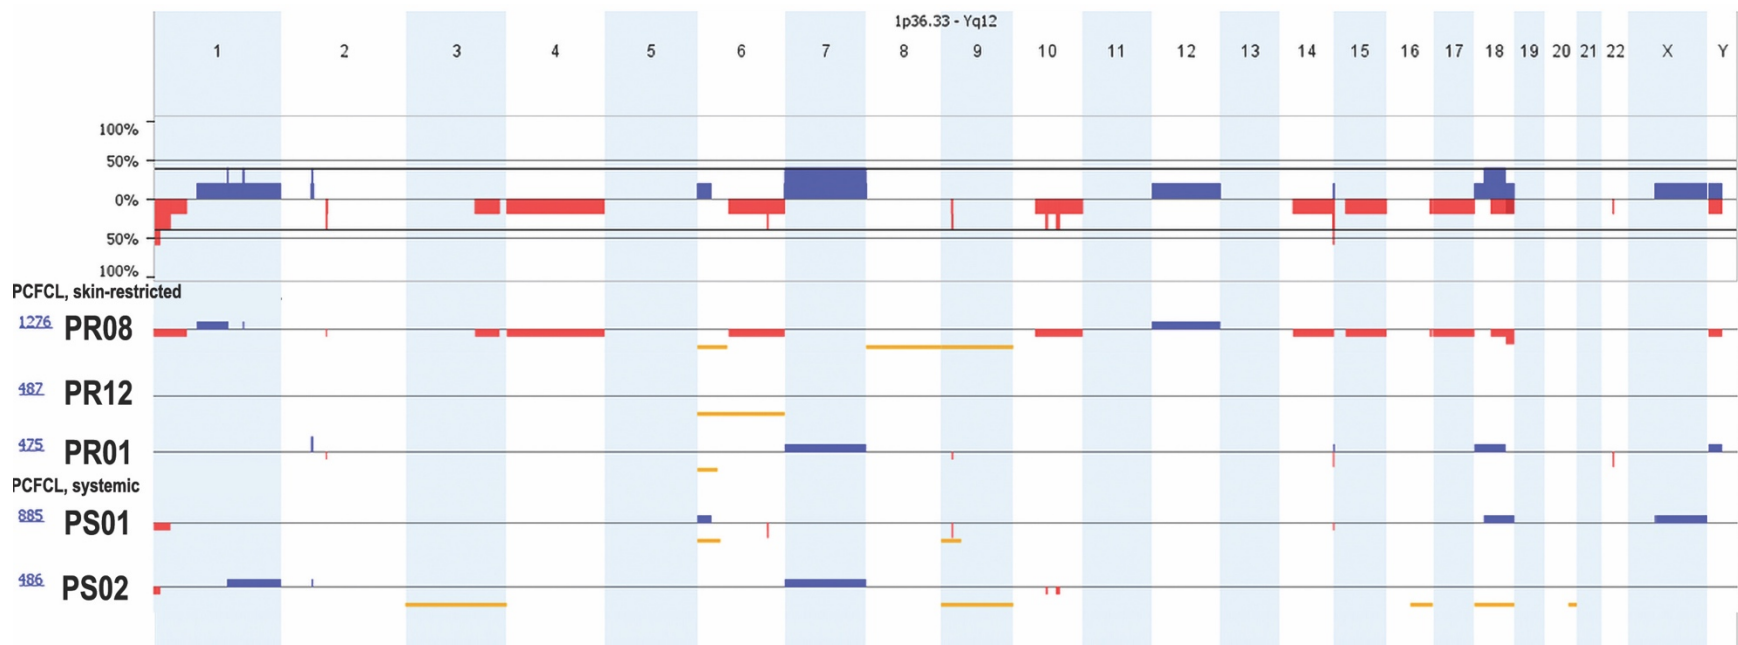

**Supplemental Figure S2.** Copy number analysis of 5 PCFCL samples using the OncoScan assay (3 PCFCL (skin restricted) and 2 PCFCL (systemic)). (a) Copy number variation (CNV) (red = loss, blue = gain) and (b) loss of heterozygosity (LOH) (yellow/orange) events are presented as colored bands sorted by chromosome for each sample (n=5).

|                            | PCFCL<br>(skin<br>restricted) | SCFL* | PTFL | Usual<br>Systemic FL | Diffuse FL |
|----------------------------|-------------------------------|-------|------|----------------------|------------|
| PCFCL<br>(skin restricted) | 1.00                          | 0.24  | 0.57 | 0.36                 | 0.24       |
| SCFL*                      | 0.33                          | 1.00  | 0.40 | 0.91                 | 0.69       |

\*SCFL and PCFCL (systemic) are combined here given few PCFCL (systemic) samples and close similarity between SCFL and PCFCL (systemic)

**Supplemental Figure S3. Correlation matrix of similarity comparing PCFCL (skin restricted) and SCFL with other FL subtypes.** Similarity index is based on relative mutation prevalence in PCFCL (skin restricted) or SCFL of the most commonly mutated genes in each FL subtype and uses a scale from 0 to 1 where 1 = exact correlation and 0 = no correlation.

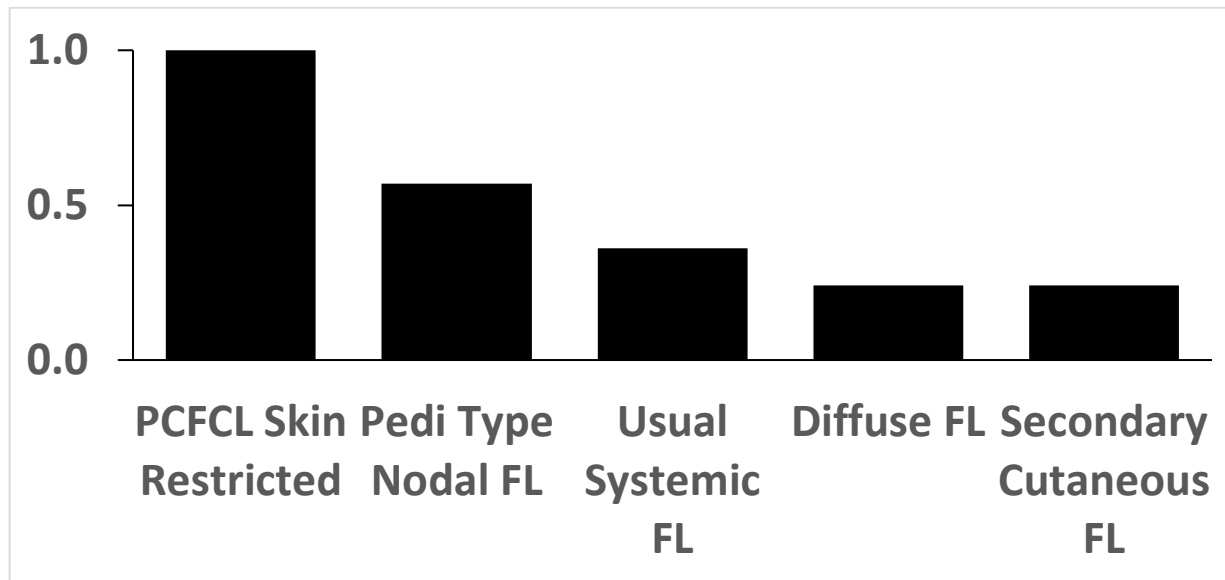

**Supplemental Figure S4. Similarity index comparing PCFCL (skin restricted) with other FL subtypes.** Similarity index is based on relative mutation prevalence in PCFCL (skin restricted) of the most commonly mutated genes in each FL subtype and uses a scale from 0 to 1 where 1 = exact correlation and 0 = no correlation.
